# Supplementary material
Source: publisher figshare collection journal article supplement (https://acs.figshare.com/ndownloader/files/4014334)
Supplement: Supplementary file 1 [file 4014334]

 
 
# SUBMISSION DETAILS

_publ_contact_author_name             'Takuji Hirose'
_publ_contact_author_email            'hirose@apc.saitama-u.ac.jp'
_publ_contact_author_address          '255 Shimo-Okubo,Sakura-ku,Saitama,Japan'
_publ_contact_author_fax              '+81-48-858-9548'
_publ_contact_author_phone            '+81-48-858-9548'
_publ_contact_letter
;
    ENTER TEXT OF LETTER
;
_publ_requested_journal               'J. Org. Chem.'

#============================================================================== 

# TITLE AND AUTHOR LIST

_publ_section_title
;
Solvent-induced reversed stereoselectivity in reciprocal
resolutions of mandelic acid and erythro-2-amino-1,2-
diphenylethanol
;
_publ_section_title_footnote
;
    ENTER FOOTNOTE TO TITLE OF PAPER
;
loop_
_publ_author_name
_publ_author_footnote
_publ_author_address

' Hiroaki Shitara'
;
  Technical Support Center,
  Saitama University
;
;
  255 Shimo-Okubo,Sakura-ku,Saitama,Japan
;
;
  Toshiki Shintani
;
;
  Saitama Prefectural Koshigayakita Senior High School
;
;
  Ohdomari,Koshigaya City,Saitama,Japan
;
;
  Koichi Kodama
;
;
  Dept. of Applied Chemistry, Graduate School of Engineering,
  Saitama University
;
;
  255 Shimo-Okubo,Sakura-ku,Saitama,Japan
;
;
  Takuji Hirose 
;
;
  Dept. of Applied Chemistry, Graduate School of Engineering,
  Saitama University
;
;
  255 Shimo-Okubo,Sakura-ku,Saitama,Japan
;


_publ_section_synopsis
;
  ENTER SYNOPSIS
; 


#=====================================================================

data_2((S)-1)_(1R,2S)-2_2(1,4-dioxane) 
 
#=====================================================================  
 
_audit_creation_method            SHELXL-97 
_chemical_name_systematic 
; 
 ? 
; 
_chemical_name_common             ? 
_chemical_melting_point           ? 
_chemical_formula_moiety          ? 
_chemical_formula_sum 
 'C38 H47 N O11' 
_chemical_formula_weight          693.77 
 
loop_ 
 _atom_type_symbol 
 _atom_type_description 
 _atom_type_scat_dispersion_real 
 _atom_type_scat_dispersion_imag 
 _atom_type_scat_source 
 'C'  'C'   0.0033   0.0016 
 'International Tables Vol C Tables 4.2.6.8 and 6.1.1.4' 
 'H'  'H'   0.0000   0.0000 
 'International Tables Vol C Tables 4.2.6.8 and 6.1.1.4' 
 'N'  'N'   0.0061   0.0033 
 'International Tables Vol C Tables 4.2.6.8 and 6.1.1.4' 
 'O'  'O'   0.0106   0.0060 
 'International Tables Vol C Tables 4.2.6.8 and 6.1.1.4' 
 
_symmetry_cell_setting            Triclinic 
_symmetry_space_group_name_H-M    P1 
 
loop_ 
 _symmetry_equiv_pos_as_xyz 
 'x, y, z' 
 
_cell_length_a                    8.585(8) 
_cell_length_b                    8.790(8) 
_cell_length_c                    12.585(11) 
_cell_angle_alpha                 89.579(12) 
_cell_angle_beta                  82.776(11) 
_cell_angle_gamma                 67.638(10) 
_cell_volume                      870.5(13) 
_cell_formula_units_Z             1 
_cell_measurement_temperature     150(2) 
_cell_measurement_reflns_used     ? 
_cell_measurement_theta_min       ? 
_cell_measurement_theta_max       ? 
 
_exptl_crystal_description        platelet 
_exptl_crystal_colour             colorless 
_exptl_crystal_size_max           0.22 
_exptl_crystal_size_mid           0.13 
_exptl_crystal_size_min           0.04 
_exptl_crystal_density_meas       ? 
_exptl_crystal_density_diffrn     1.323 
_exptl_crystal_density_method     'not measured' 
_exptl_crystal_F_000              370 
_exptl_absorpt_coefficient_mu     0.097 
_exptl_absorpt_correction_type    'multi-scan'  
_exptl_absorpt_correction_T_min   0.9790 
_exptl_absorpt_correction_T_max   0.9961 
_exptl_absorpt_process_details    ? 
_chemical_absolute_configuration  rm
 
_exptl_special_details 
; 
 ? 
; 
 
_diffrn_ambient_temperature       150(2) 
_diffrn_radiation_wavelength      0.71073 
_diffrn_radiation_type            MoK\a 
_diffrn_radiation_source          'fine-focus sealed tube' 
_diffrn_radiation_monochromator   graphite 
_diffrn_measurement_device_type   CCD 
_diffrn_measurement_method        \w 
_diffrn_detector_area_resol_mean  ? 
_diffrn_standards_number          ? 
_diffrn_standards_interval_count  ? 
_diffrn_standards_interval_time   ? 
_diffrn_standards_decay_%         ? 
_diffrn_reflns_number             4087 
_diffrn_reflns_av_R_equivalents   0.1019 
_diffrn_reflns_av_sigmaI/netI     0.0528 
_diffrn_reflns_limit_h_min        -8 
_diffrn_reflns_limit_h_max        10 
_diffrn_reflns_limit_k_min        -10 
_diffrn_reflns_limit_k_max        10 
_diffrn_reflns_limit_l_min        -14 
_diffrn_reflns_limit_l_max        11 
_diffrn_reflns_theta_min          1.63 
_diffrn_reflns_theta_max          25.00 
_reflns_number_total              3474 
_reflns_number_gt                 3130 
_reflns_threshold_expression      >2sigma(I) 
 
_computing_data_collection        ? 
_computing_cell_refinement        ? 
_computing_data_reduction         ? 
_computing_structure_solution     'SHELXS-97 (Sheldrick, 1990)' 
_computing_structure_refinement   'SHELXL-97 (Sheldrick, 1997)' 
_computing_molecular_graphics     ? 
_computing_publication_material   ? 
 
_refine_special_details 
; 
 Refinement of F^2^ against ALL reflections.  The weighted R-factor wR and 
 goodness of fit S are based on F^2^, conventional R-factors R are based 
 on F, with F set to zero for negative F^2^. The threshold expression of 
 F^2^ > 2sigma(F^2^) is used only for calculating R-factors(gt) etc. and is 
 not relevant to the choice of reflections for refinement.  R-factors based 
 on F^2^ are statistically about twice as large as those based on F, and R- 
 factors based on ALL data will be even larger. 
; 
 
_refine_ls_structure_factor_coef  Fsqd  
_refine_ls_matrix_type            full 
_refine_ls_weighting_scheme       calc  
_refine_ls_weighting_details 
 'calc w=1/[\s^2^(Fo^2^)+(0.1503P)^2^+0.8178P] where P=(Fo^2^+2Fc^2^)/3' 
_atom_sites_solution_primary      direct 
_atom_sites_solution_secondary    difmap 
_atom_sites_solution_hydrogens    geom 
_refine_ls_hydrogen_treatment     mixed 
_refine_ls_extinction_method      none 
_refine_ls_extinction_coef        ? 
_refine_ls_abs_structure_details 
 'Flack H D (1983), Acta Cryst. A39, 876-881' 
_refine_ls_abs_structure_Flack    0.1(19) 
_refine_ls_number_reflns          3474 
_refine_ls_number_parameters      452 
_refine_ls_number_restraints      3 
_refine_ls_R_factor_all           0.0777 
_refine_ls_R_factor_gt            0.0704 
_refine_ls_wR_factor_ref          0.2114 
_refine_ls_wR_factor_gt           0.1957 
_refine_ls_goodness_of_fit_ref    1.039 
_refine_ls_restrained_S_all       1.038 
_refine_ls_shift/su_max           0.001 
_refine_ls_shift/su_mean          0.000 
 
loop_ 
 _atom_site_label 
 _atom_site_type_symbol 
 _atom_site_fract_x 
 _atom_site_fract_y 
 _atom_site_fract_z 
 _atom_site_U_iso_or_equiv 
 _atom_site_adp_type 
 _atom_site_occupancy 
 _atom_site_symmetry_multiplicity 
 _atom_site_calc_flag 
 _atom_site_refinement_flags 
 _atom_site_disorder_assembly 
 _atom_site_disorder_group 
O1 O 0.4737(4) 0.4744(4) 0.3692(3) 0.0256(8) Uani 1 1 d . . . 
O2 O 0.1203(5) 0.0622(5) 0.3569(3) 0.0259(8) Uani 1 1 d . . . 
H1 H 0.1498 0.0415 0.2907 0.039 Uiso 1 1 calc R . . 
O3 O -0.2388(4) -0.1502(4) 0.4014(3) 0.0258(8) Uani 1 1 d . . . 
H48 H -0.2588 -0.2366 0.4013 0.039 Uiso 1 1 calc R . . 
O4 O 0.7830(5) 0.2400(4) 0.3513(3) 0.0259(8) Uani 1 1 d . . . 
H3 H 0.8009 0.1772 0.2972 0.039 Uiso 1 1 calc R . . 
O5 O 0.1943(5) -0.3033(5) 0.4379(3) 0.0283(9) Uani 1 1 d . . . 
H4 H 0.2801 -0.3842 0.4108 0.042 Uiso 1 1 calc R . . 
O6 O 0.5820(5) 0.6631(5) 0.3886(4) 0.0322(10) Uani 1 1 d . . . 
C1 C 0.2146(7) 0.0815(7) 0.5260(5) 0.0241(11) Uani 1 1 d . . . 
N1 N 0.4866(6) 0.1601(6) 0.4090(4) 0.0242(10) Uani 1 1 d . . . 
H45 H 0.4465 0.1870 0.4900 0.036 Uiso 1 1 calc R . . 
H46 H 0.5314 0.2465 0.3770 0.036 Uiso 1 1 calc R . . 
H47 H 0.5826 0.0445 0.3979 0.036 Uiso 1 1 calc R . . 
C2 C 0.5958(7) 0.5235(7) 0.3634(4) 0.0239(12) Uani 1 1 d . . . 
C3 C 0.2653(6) 0.0448(7) 0.4075(4) 0.0206(11) Uani 1 1 d . . . 
H5 H 0.3506 -0.0707 0.3946 0.025 Uiso 1 1 calc R . . 
C4 C 0.8835(7) 0.4940(7) 0.1474(5) 0.0298(13) Uani 1 1 d . . . 
H6 H 0.9358 0.5457 0.1891 0.036 Uiso 1 1 calc R . . 
C5 C 0.7915(7) 0.4091(7) 0.1974(5) 0.0256(12) Uani 1 1 d . . . 
C6 C 0.0559(7) -0.3171(7) 0.4124(4) 0.0215(11) Uani 1 1 d . . . 
C7 C -0.1018(7) -0.1732(7) 0.4599(4) 0.0221(11) Uani 1 1 d . . . 
H7 H -0.0755 -0.0717 0.4544 0.026 Uiso 1 1 calc R . . 
O7 O 0.0539(5) -0.4313(5) 0.3621(3) 0.0325(10) Uani 1 1 d . . . 
O8 O 0.1622(6) -0.1454(6) 0.1920(4) 0.0478(13) Uani 1 1 d . . . 
C8 C -0.1425(7) -0.1982(7) 0.5778(5) 0.0249(12) Uani 1 1 d . . . 
O9 O 0.4924(8) 0.4369(7) 0.8009(4) 0.0580(15) Uani 1 1 d . . . 
O10 O 0.4337(6) 0.3197(6) 0.6112(4) 0.0488(13) Uani 1 1 d . . . 
C9 C 0.7700(7) 0.3977(6) 0.3179(4) 0.0218(11) Uani 1 1 d . . . 
H8 H 0.8593 0.4258 0.3471 0.026 Uiso 1 1 calc R . . 
C10 C 0.3055(8) -0.0297(7) 0.5963(5) 0.0322(13) Uani 1 1 d . . . 
H9 H 0.3965 -0.1287 0.5695 0.039 Uiso 1 1 calc R . . 
C11 C 0.3408(6) 0.1632(6) 0.3542(4) 0.0211(11) Uani 1 1 d . . . 
H10 H 0.2513 0.2770 0.3638 0.025 Uiso 1 1 calc R . . 
C12 C 0.0833(8) 0.2253(8) 0.5664(5) 0.0329(13) Uani 1 1 d . . . 
H11 H 0.0214 0.3026 0.5188 0.039 Uiso 1 1 calc R . . 
C13 C 0.3963(7) 0.1247(7) 0.2367(4) 0.0229(11) Uani 1 1 d . . . 
C14 C 0.5238(7) -0.0228(7) 0.1955(5) 0.0305(13) Uani 1 1 d . . . 
H12 H 0.5806 -0.1033 0.2431 0.037 Uiso 1 1 calc R . . 
C15 C 0.7124(8) 0.3357(8) 0.1344(5) 0.0331(14) Uani 1 1 d . . . 
H13 H 0.6475 0.2774 0.1675 0.040 Uiso 1 1 calc R . . 
O11 O 0.1455(7) -0.2347(8) -0.0181(4) 0.0556(14) Uani 1 1 d . . . 
C16 C 0.8227(9) 0.4325(8) -0.0238(5) 0.0399(15) Uani 1 1 d . . . 
H14 H 0.8336 0.4406 -0.0995 0.048 Uiso 1 1 calc R . . 
C17 C 0.0415(9) 0.2570(9) 0.6761(5) 0.0417(16) Uani 1 1 d . . . 
H15 H -0.0499 0.3555 0.7033 0.050 Uiso 1 1 calc R . . 
C18 C 0.2627(9) 0.0046(9) 0.7052(5) 0.0405(15) Uani 1 1 d . . . 
H16 H 0.3252 -0.0715 0.7531 0.049 Uiso 1 1 calc R . . 
C19 C 0.1305(10) 0.1479(10) 0.7459(5) 0.0433(16) Uani 1 1 d . . . 
H17 H 0.1019 0.1702 0.8212 0.052 Uiso 1 1 calc R . . 
C20 C 0.9007(9) 0.5052(8) 0.0372(5) 0.0375(14) Uani 1 1 d . . . 
H18 H 0.9660 0.5627 0.0036 0.045 Uiso 1 1 calc R . . 
C21 C 0.5685(8) -0.0532(8) 0.0868(5) 0.0369(14) Uani 1 1 d . . . 
H19 H 0.6568 -0.1539 0.0598 0.044 Uiso 1 1 calc R . . 
C22 C 0.3046(10) -0.2844(11) 0.0234(6) 0.0523(19) Uani 1 1 d . . . 
H20 H 0.3568 -0.2028 0.0060 0.063 Uiso 1 1 calc R . . 
H21 H 0.3831 -0.3922 -0.0102 0.063 Uiso 1 1 calc R . . 
C23 C -0.2800(9) -0.2996(9) 0.7228(5) 0.0413(15) Uani 1 1 d . . . 
H22 H -0.3530 -0.3549 0.7468 0.050 Uiso 1 1 calc R . . 
C24 C -0.2453(8) -0.2787(7) 0.6144(5) 0.0324(13) Uani 1 1 d . . . 
H23 H -0.2942 -0.3214 0.5645 0.039 Uiso 1 1 calc R . . 
C25 C -0.0678(9) -0.1395(8) 0.6523(5) 0.0379(15) Uani 1 1 d . . . 
H24 H 0.0055 -0.0846 0.6282 0.045 Uiso 1 1 calc R . . 
C26 C 0.4866(9) 0.0608(9) 0.0171(5) 0.0396(15) Uani 1 1 d . . . 
H25 H 0.5180 0.0384 -0.0580 0.047 Uiso 1 1 calc R . . 
C27 C 0.2769(10) -0.2973(9) 0.1425(6) 0.0497(18) Uani 1 1 d . . . 
H26 H 0.2310 -0.3837 0.1594 0.060 Uiso 1 1 calc R . . 
H27 H 0.3868 -0.3297 0.1711 0.060 Uiso 1 1 calc R . . 
C28 C 0.3142(8) 0.2376(8) 0.1637(5) 0.0350(14) Uani 1 1 d . . . 
H28 H 0.2247 0.3381 0.1896 0.042 Uiso 1 1 calc R . . 
C29 C -0.2085(10) -0.2401(9) 0.7953(5) 0.0464(17) Uani 1 1 d . . . 
H29 H -0.2331 -0.2530 0.8698 0.056 Uiso 1 1 calc R . . 
C30 C 0.7291(10) 0.3484(9) 0.0251(6) 0.0425(16) Uani 1 1 d . . . 
H30 H 0.6755 0.2987 -0.0171 0.051 Uiso 1 1 calc R . . 
C31 C 0.0033(9) -0.0958(9) 0.1510(6) 0.0440(17) Uani 1 1 d . . . 
H31 H -0.0757 0.0116 0.1849 0.053 Uiso 1 1 calc R . . 
H32 H -0.0484 -0.1780 0.1674 0.053 Uiso 1 1 calc R . . 
C32 C 0.3294(12) 0.4782(10) 0.6546(7) 0.058(2) Uani 1 1 d . . . 
H33 H 0.2126 0.5071 0.6371 0.069 Uiso 1 1 calc R . . 
H34 H 0.3731 0.5598 0.6226 0.069 Uiso 1 1 calc R . . 
C33 C 0.3602(10) 0.2064(9) 0.0547(5) 0.0459(18) Uani 1 1 d . . . 
H35 H 0.3043 0.2857 0.0062 0.055 Uiso 1 1 calc R . . 
C34 C 0.0334(10) -0.0819(11) 0.0320(6) 0.055(2) Uani 1 1 d . . . 
H36 H -0.0762 -0.0461 0.0027 0.066 Uiso 1 1 calc R . . 
H37 H 0.0825 0.0024 0.0162 0.066 Uiso 1 1 calc R . . 
C35 C -0.1001(11) -0.1611(9) 0.7604(6) 0.0470(17) Uani 1 1 d . . . 
H38 H -0.0485 -0.1221 0.8106 0.056 Uiso 1 1 calc R . . 
C36 C 0.5956(10) 0.2798(11) 0.7571(7) 0.055(2) Uani 1 1 d . . . 
H39 H 0.5499 0.1985 0.7872 0.066 Uiso 1 1 calc R . . 
H40 H 0.7117 0.2492 0.7762 0.066 Uiso 1 1 calc R . . 
C37 C 0.3260(12) 0.4843(12) 0.7727(7) 0.068(3) Uani 1 1 d . . . 
H41 H 0.2560 0.5975 0.8018 0.081 Uiso 1 1 calc R . . 
H42 H 0.2731 0.4096 0.8051 0.081 Uiso 1 1 calc R . . 
C38 C 0.6022(11) 0.2765(15) 0.6390(7) 0.071(3) Uani 1 1 d . . . 
H43 H 0.6510 0.3554 0.6086 0.085 Uiso 1 1 calc R . . 
H44 H 0.6760 0.1650 0.6086 0.085 Uiso 1 1 calc R . . 
 
loop_ 
 _atom_site_aniso_label 
 _atom_site_aniso_U_11 
 _atom_site_aniso_U_22 
 _atom_site_aniso_U_33 
 _atom_site_aniso_U_23 
 _atom_site_aniso_U_13 
 _atom_site_aniso_U_12 
O1 0.0208(19) 0.0213(18) 0.036(2) 0.0004(16) 0.0036(15) -0.0113(15) 
O2 0.0193(18) 0.033(2) 0.024(2) -0.0009(16) -0.0002(15) -0.0091(15) 
O3 0.0200(19) 0.0253(19) 0.032(2) 0.0063(16) -0.0057(15) -0.0081(15) 
O4 0.0283(19) 0.0239(19) 0.025(2) 0.0031(15) 0.0017(15) -0.0111(15) 
O5 0.0221(19) 0.029(2) 0.032(2) -0.0021(16) -0.0024(16) -0.0090(16) 
O6 0.025(2) 0.022(2) 0.047(3) -0.0023(17) 0.0003(18) -0.0080(16) 
C1 0.025(3) 0.025(3) 0.026(3) 0.004(2) 0.000(2) -0.015(2) 
N1 0.025(2) 0.023(2) 0.027(2) -0.0008(19) -0.0003(18) -0.0135(19) 
C2 0.030(3) 0.024(3) 0.019(3) 0.007(2) -0.002(2) -0.012(2) 
C3 0.013(2) 0.022(3) 0.027(3) -0.001(2) -0.004(2) -0.0062(19) 
C4 0.027(3) 0.030(3) 0.031(3) 0.007(2) -0.002(2) -0.011(2) 
C5 0.022(3) 0.024(3) 0.027(3) 0.001(2) -0.002(2) -0.005(2) 
C6 0.022(3) 0.023(3) 0.022(3) 0.006(2) -0.001(2) -0.011(2) 
C7 0.020(3) 0.024(3) 0.025(3) 0.008(2) -0.004(2) -0.011(2) 
O7 0.028(2) 0.032(2) 0.036(2) -0.0060(18) -0.0015(17) -0.0107(17) 
O8 0.056(3) 0.041(3) 0.033(3) -0.009(2) -0.012(2) -0.001(2) 
C8 0.023(3) 0.021(3) 0.024(3) 0.002(2) 0.002(2) -0.002(2) 
O9 0.069(4) 0.072(4) 0.034(3) -0.010(3) -0.016(3) -0.025(3) 
O10 0.053(3) 0.050(3) 0.033(3) -0.010(2) -0.013(2) -0.006(2) 
C9 0.023(3) 0.017(2) 0.026(3) 0.002(2) -0.001(2) -0.011(2) 
C10 0.030(3) 0.027(3) 0.037(4) 0.008(3) -0.003(2) -0.009(2) 
C11 0.015(2) 0.022(3) 0.024(3) 0.004(2) -0.001(2) -0.004(2) 
C12 0.031(3) 0.035(3) 0.026(3) 0.003(3) 0.001(2) -0.007(3) 
C13 0.024(3) 0.027(3) 0.021(3) 0.005(2) -0.003(2) -0.013(2) 
C14 0.032(3) 0.032(3) 0.023(3) 0.003(2) -0.004(2) -0.007(3) 
C15 0.044(4) 0.031(3) 0.027(3) 0.001(2) -0.001(3) -0.019(3) 
O11 0.052(3) 0.076(4) 0.032(3) -0.018(3) -0.004(2) -0.018(3) 
C16 0.052(4) 0.036(3) 0.021(3) 0.000(3) 0.001(3) -0.007(3) 
C17 0.043(4) 0.046(4) 0.027(3) -0.004(3) 0.004(3) -0.009(3) 
C18 0.047(4) 0.043(4) 0.028(3) 0.012(3) -0.005(3) -0.013(3) 
C19 0.056(4) 0.054(4) 0.021(3) 0.005(3) -0.001(3) -0.024(4) 
C20 0.042(4) 0.034(3) 0.032(3) 0.007(3) 0.004(3) -0.013(3) 
C21 0.035(3) 0.036(4) 0.029(3) -0.003(3) 0.005(3) -0.006(3) 
C22 0.045(4) 0.063(5) 0.040(4) -0.009(4) -0.002(3) -0.011(4) 
C23 0.046(4) 0.039(4) 0.032(3) 0.012(3) 0.008(3) -0.013(3) 
C24 0.034(3) 0.030(3) 0.029(3) 0.002(2) 0.004(2) -0.010(2) 
C25 0.044(4) 0.042(4) 0.031(3) 0.001(3) -0.004(3) -0.020(3) 
C26 0.048(4) 0.050(4) 0.019(3) 0.003(3) 0.003(3) -0.019(3) 
C27 0.065(5) 0.039(4) 0.037(4) -0.002(3) -0.007(3) -0.010(3) 
C28 0.042(4) 0.030(3) 0.028(3) 0.007(3) -0.005(3) -0.008(3) 
C29 0.061(5) 0.042(4) 0.021(3) 0.008(3) 0.007(3) -0.008(3) 
C30 0.056(4) 0.042(4) 0.032(4) 0.001(3) -0.006(3) -0.020(3) 
C31 0.049(4) 0.044(4) 0.033(4) -0.008(3) -0.006(3) -0.012(3) 
C32 0.075(5) 0.039(4) 0.045(5) -0.003(3) -0.017(4) -0.003(4) 
C33 0.065(5) 0.049(4) 0.024(3) 0.015(3) -0.011(3) -0.020(4) 
C34 0.053(5) 0.070(5) 0.031(4) 0.004(3) -0.013(3) -0.010(4) 
C35 0.068(5) 0.047(4) 0.023(3) -0.001(3) -0.009(3) -0.018(4) 
C36 0.049(4) 0.062(5) 0.048(5) -0.002(4) -0.015(4) -0.011(4) 
C37 0.073(6) 0.064(6) 0.047(5) -0.016(4) -0.014(4) -0.002(4) 
C38 0.055(5) 0.099(7) 0.042(5) -0.011(5) -0.003(4) -0.012(5) 
 
_geom_special_details 
; 
 All esds (except the esd in the dihedral angle between two l.s. planes) 
 are estimated using the full covariance matrix.  The cell esds are taken 
 into account individually in the estimation of esds in distances, angles 
 and torsion angles; correlations between esds in cell parameters are only 
 used when they are defined by crystal symmetry.  An approximate (isotropic) 
 treatment of cell esds is used for estimating esds involving l.s. planes. 
; 
 
loop_ 
 _geom_bond_atom_site_label_1 
 _geom_bond_atom_site_label_2 
 _geom_bond_distance 
 _geom_bond_site_symmetry_2 
 _geom_bond_publ_flag 
O1 C2 1.270(6) . ? 
O2 C3 1.425(6) . ? 
O3 C7 1.415(6) . ? 
O4 C9 1.412(6) . ? 
O5 C6 1.317(7) . ? 
O6 C2 1.227(7) . ? 
C1 C12 1.381(8) . ? 
C1 C10 1.389(8) . ? 
C1 C3 1.501(8) . ? 
N1 C11 1.495(6) . ? 
C2 C9 1.525(8) . ? 
C3 C11 1.532(7) . ? 
C4 C5 1.376(8) . ? 
C4 C20 1.382(9) . ? 
C5 C15 1.408(8) . ? 
C5 C9 1.511(8) . ? 
C6 O7 1.199(7) . ? 
C6 C7 1.515(8) . ? 
C7 C8 1.514(8) . ? 
O8 C27 1.414(8) . ? 
O8 C31 1.428(8) . ? 
C8 C24 1.364(8) . ? 
C8 C25 1.402(8) . ? 
O9 C36 1.398(10) . ? 
O9 C37 1.418(11) . ? 
O10 C32 1.407(9) . ? 
O10 C38 1.438(10) . ? 
C10 C18 1.378(9) . ? 
C11 C13 1.494(8) . ? 
C12 C17 1.385(9) . ? 
C13 C14 1.391(8) . ? 
C13 C28 1.394(8) . ? 
C14 C21 1.373(9) . ? 
C15 C30 1.373(9) . ? 
O11 C34 1.415(10) . ? 
O11 C22 1.432(9) . ? 
C16 C30 1.375(11) . ? 
C16 C20 1.382(10) . ? 
C17 C19 1.369(10) . ? 
C18 C19 1.383(10) . ? 
C21 C26 1.369(10) . ? 
C22 C27 1.498(11) . ? 
C23 C29 1.369(11) . ? 
C23 C24 1.386(9) . ? 
C25 C35 1.380(10) . ? 
C26 C33 1.365(11) . ? 
C28 C33 1.378(9) . ? 
C29 C35 1.388(11) . ? 
C31 C34 1.499(11) . ? 
C32 C37 1.484(12) . ? 
C36 C38 1.480(11) . ? 
 
loop_ 
 _geom_angle_atom_site_label_1 
 _geom_angle_atom_site_label_2 
 _geom_angle_atom_site_label_3 
 _geom_angle 
 _geom_angle_site_symmetry_1 
 _geom_angle_site_symmetry_3 
 _geom_angle_publ_flag 
C12 C1 C10 119.4(5) . . ? 
C12 C1 C3 121.5(5) . . ? 
C10 C1 C3 119.0(5) . . ? 
O6 C2 O1 125.1(5) . . ? 
O6 C2 C9 119.0(5) . . ? 
O1 C2 C9 115.9(5) . . ? 
O2 C3 C1 110.1(4) . . ? 
O2 C3 C11 106.7(4) . . ? 
C1 C3 C11 112.3(4) . . ? 
C5 C4 C20 120.9(5) . . ? 
C4 C5 C15 118.7(5) . . ? 
C4 C5 C9 121.4(5) . . ? 
C15 C5 C9 119.8(5) . . ? 
O7 C6 O5 124.7(5) . . ? 
O7 C6 C7 124.2(5) . . ? 
O5 C6 C7 111.1(4) . . ? 
O3 C7 C8 113.0(4) . . ? 
O3 C7 C6 111.0(4) . . ? 
C8 C7 C6 109.4(4) . . ? 
C27 O8 C31 110.3(5) . . ? 
C24 C8 C25 118.6(6) . . ? 
C24 C8 C7 122.9(5) . . ? 
C25 C8 C7 118.5(5) . . ? 
C36 O9 C37 110.5(6) . . ? 
C32 O10 C38 109.5(6) . . ? 
O4 C9 C5 113.3(4) . . ? 
O4 C9 C2 108.9(4) . . ? 
C5 C9 C2 108.4(4) . . ? 
C18 C10 C1 119.5(6) . . ? 
N1 C11 C13 110.3(4) . . ? 
N1 C11 C3 109.5(4) . . ? 
C13 C11 C3 112.7(4) . . ? 
C1 C12 C17 120.2(6) . . ? 
C14 C13 C28 117.5(5) . . ? 
C14 C13 C11 123.0(5) . . ? 
C28 C13 C11 119.4(5) . . ? 
C21 C14 C13 120.8(5) . . ? 
C30 C15 C5 120.0(6) . . ? 
C34 O11 C22 109.2(5) . . ? 
C30 C16 C20 119.9(6) . . ? 
C19 C17 C12 120.7(6) . . ? 
C10 C18 C19 121.2(6) . . ? 
C17 C19 C18 118.9(6) . . ? 
C16 C20 C4 119.8(6) . . ? 
C26 C21 C14 120.3(6) . . ? 
O11 C22 C27 109.8(6) . . ? 
C29 C23 C24 119.7(7) . . ? 
C8 C24 C23 121.5(6) . . ? 
C35 C25 C8 120.4(6) . . ? 
C33 C26 C21 120.5(6) . . ? 
O8 C27 C22 110.7(6) . . ? 
C33 C28 C13 121.4(6) . . ? 
C23 C29 C35 120.2(6) . . ? 
C15 C30 C16 120.6(6) . . ? 
O8 C31 C34 108.8(6) . . ? 
O10 C32 C37 110.3(6) . . ? 
C26 C33 C28 119.5(6) . . ? 
O11 C34 C31 110.8(7) . . ? 
C25 C35 C29 119.6(6) . . ? 
O9 C36 C38 110.2(7) . . ? 
O9 C37 C32 111.1(8) . . ? 
O10 C38 C36 109.7(7) . . ? 
 
loop_ 
 _geom_torsion_atom_site_label_1 
 _geom_torsion_atom_site_label_2 
 _geom_torsion_atom_site_label_3 
 _geom_torsion_atom_site_label_4 
 _geom_torsion 
 _geom_torsion_site_symmetry_1 
 _geom_torsion_site_symmetry_2 
 _geom_torsion_site_symmetry_3 
 _geom_torsion_site_symmetry_4 
 _geom_torsion_publ_flag 
C12 C1 C3 O2 -52.1(7) . . . . ? 
C10 C1 C3 O2 129.9(5) . . . . ? 
C12 C1 C3 C11 66.6(6) . . . . ? 
C10 C1 C3 C11 -111.4(5) . . . . ? 
C20 C4 C5 C15 -1.1(9) . . . . ? 
C20 C4 C5 C9 -179.3(5) . . . . ? 
O7 C6 C7 O3 -26.3(7) . . . . ? 
O5 C6 C7 O3 156.5(4) . . . . ? 
O7 C6 C7 C8 99.1(6) . . . . ? 
O5 C6 C7 C8 -78.1(6) . . . . ? 
O3 C7 C8 C24 34.2(7) . . . . ? 
C6 C7 C8 C24 -90.0(6) . . . . ? 
O3 C7 C8 C25 -147.4(5) . . . . ? 
C6 C7 C8 C25 88.4(6) . . . . ? 
C4 C5 C9 O4 -139.2(5) . . . . ? 
C15 C5 C9 O4 42.6(7) . . . . ? 
C4 C5 C9 C2 99.8(6) . . . . ? 
C15 C5 C9 C2 -78.3(6) . . . . ? 
O6 C2 C9 O4 146.5(5) . . . . ? 
O1 C2 C9 O4 -35.6(6) . . . . ? 
O6 C2 C9 C5 -89.9(6) . . . . ? 
O1 C2 C9 C5 88.1(5) . . . . ? 
C12 C1 C10 C18 0.4(8) . . . . ? 
C3 C1 C10 C18 178.4(5) . . . . ? 
O2 C3 C11 N1 176.0(4) . . . . ? 
C1 C3 C11 N1 55.2(5) . . . . ? 
O2 C3 C11 C13 -60.9(5) . . . . ? 
C1 C3 C11 C13 178.3(5) . . . . ? 
C10 C1 C12 C17 -0.8(9) . . . . ? 
C3 C1 C12 C17 -178.8(5) . . . . ? 
N1 C11 C13 C14 60.0(7) . . . . ? 
C3 C11 C13 C14 -62.7(6) . . . . ? 
N1 C11 C13 C28 -122.3(6) . . . . ? 
C3 C11 C13 C28 115.0(6) . . . . ? 
C28 C13 C14 C21 1.3(9) . . . . ? 
C11 C13 C14 C21 179.1(5) . . . . ? 
C4 C5 C15 C30 0.6(9) . . . . ? 
C9 C5 C15 C30 178.8(6) . . . . ? 
C1 C12 C17 C19 0.8(10) . . . . ? 
C1 C10 C18 C19 0.1(10) . . . . ? 
C12 C17 C19 C18 -0.3(11) . . . . ? 
C10 C18 C19 C17 -0.1(11) . . . . ? 
C30 C16 C20 C4 -0.4(10) . . . . ? 
C5 C4 C20 C16 1.0(10) . . . . ? 
C13 C14 C21 C26 -0.7(10) . . . . ? 
C34 O11 C22 C27 58.3(9) . . . . ? 
C25 C8 C24 C23 1.6(9) . . . . ? 
C7 C8 C24 C23 180.0(6) . . . . ? 
C29 C23 C24 C8 -0.7(10) . . . . ? 
C24 C8 C25 C35 -0.9(9) . . . . ? 
C7 C8 C25 C35 -179.4(6) . . . . ? 
C14 C21 C26 C33 0.4(11) . . . . ? 
C31 O8 C27 C22 58.5(8) . . . . ? 
O11 C22 C27 O8 -58.1(9) . . . . ? 
C14 C13 C28 C33 -1.6(9) . . . . ? 
C11 C13 C28 C33 -179.4(6) . . . . ? 
C24 C23 C29 C35 -0.8(11) . . . . ? 
C5 C15 C30 C16 0.0(10) . . . . ? 
C20 C16 C30 C15 -0.1(11) . . . . ? 
C27 O8 C31 C34 -58.5(8) . . . . ? 
C38 O10 C32 C37 -57.8(10) . . . . ? 
C21 C26 C33 C28 -0.6(11) . . . . ? 
C13 C28 C33 C26 1.2(10) . . . . ? 
C22 O11 C34 C31 -60.0(9) . . . . ? 
O8 C31 C34 O11 59.9(8) . . . . ? 
C8 C25 C35 C29 -0.6(11) . . . . ? 
C23 C29 C35 C25 1.4(12) . . . . ? 
C37 O9 C36 C38 58.2(10) . . . . ? 
C36 O9 C37 C32 -56.8(10) . . . . ? 
O10 C32 C37 O9 56.8(10) . . . . ? 
C32 O10 C38 C36 59.4(10) . . . . ? 
O9 C36 C38 O10 -59.7(10) . . . . ? 
 
_diffrn_measured_fraction_theta_max    0.980 
_diffrn_reflns_theta_full              25.00 
_diffrn_measured_fraction_theta_full   0.980 
_refine_diff_density_max    0.359 
_refine_diff_density_min   -0.356 
_refine_diff_density_rms    0.077 
